# Supplementary material for: Use of Lot quality assurance sampling surveys to evaluate community health worker performance in rural Zambia: a case of Luangwa district
Source: Springer Nature journal article supplement (doi:10.1186/s12913-017-2229-9), 2017-04-16
Supplement: MOESM1 [file 12224176]

# BHOMA HOUSEHOLD MONITORING TOOL

|                  |             |                       |
|------------------|-------------|-----------------------|
| District:        | CHW's Name: | Number of HH in Zone: |
| Health Facility: | CHW's Zone: | Date of Survey:       |

|                      |                                                                                                    |                                                                                        |                                                                                                         |                                                                                                                                                                   |                                                                                                                                  |                                                                                                                                                                             |                                                                                                                                                                                                                                                                                                                                                                                                                                                                  |
|----------------------|----------------------------------------------------------------------------------------------------|----------------------------------------------------------------------------------------|---------------------------------------------------------------------------------------------------------|-------------------------------------------------------------------------------------------------------------------------------------------------------------------|----------------------------------------------------------------------------------------------------------------------------------|-----------------------------------------------------------------------------------------------------------------------------------------------------------------------------|------------------------------------------------------------------------------------------------------------------------------------------------------------------------------------------------------------------------------------------------------------------------------------------------------------------------------------------------------------------------------------------------------------------------------------------------------------------|
| 1. No Of HH Sampled: | 2. Are you the head of this Household?<br><input type="checkbox"/> Yes <input type="checkbox"/> No | 3. Sex of Respondent:<br><input type="checkbox"/> Male <input type="checkbox"/> Female | 4. Does anyone in this HH know about BHOMA?<br><input type="checkbox"/> Yes <input type="checkbox"/> No | 5. Has this HH Been visited by a BHOMA CHW in the last 4 months?<br><input type="checkbox"/> Yes <input type="checkbox"/> No<br><input type="checkbox"/> Not Sure | 6. Has BHOMA helped change your household's health seeking behavior?<br><input type="checkbox"/> Yes <input type="checkbox"/> No | 7. Average time a CHW spends at your house:<br><input type="checkbox"/> Short <input type="checkbox"/> Medium<br><input type="checkbox"/> Long <input type="checkbox"/> N/A | 8. Topics discussed with BHOMA CHW at last visit (tick all that apply)                                                                                                                                                                                                                                                                                                                                                                                           |
|                      |                                                                                                    |                                                                                        |                                                                                                         | 9. Comments:                                                                                                                                                      |                                                                                                                                  |                                                                                                                                                                             |                                                                                                                                                                                                                                                                                                                                                                                                                                                                  |
|                      |                                                                                                    |                                                                                        |                                                                                                         |                                                                                                                                                                   |                                                                                                                                  |                                                                                                                                                                             | <input type="checkbox"/> Malaria <input type="checkbox"/> HIV/AIDS <input type="checkbox"/> STI <input type="checkbox"/> Pregnancy<br><input type="checkbox"/> Diarrhea <input type="checkbox"/> Child Health <input type="checkbox"/> BHOMA<br><input type="checkbox"/> Nutrition <input type="checkbox"/> Water/Sanitation <input type="checkbox"/> TB<br><input type="checkbox"/> Family Planning <input type="checkbox"/> Other <input type="checkbox"/> N/A |

|                      |                                                                                                    |                                                                                        |                                                                                                         |                                                                                                                                                                   |                                                                                                                                  |                                                                                                                                                                             |                                                                                                                                                                                                                                                                                                                                                                                                                                                                  |
|----------------------|----------------------------------------------------------------------------------------------------|----------------------------------------------------------------------------------------|---------------------------------------------------------------------------------------------------------|-------------------------------------------------------------------------------------------------------------------------------------------------------------------|----------------------------------------------------------------------------------------------------------------------------------|-----------------------------------------------------------------------------------------------------------------------------------------------------------------------------|------------------------------------------------------------------------------------------------------------------------------------------------------------------------------------------------------------------------------------------------------------------------------------------------------------------------------------------------------------------------------------------------------------------------------------------------------------------|
| 1. No Of HH Sampled: | 2. Are you the head of this Household?<br><input type="checkbox"/> Yes <input type="checkbox"/> No | 3. Sex of Respondent:<br><input type="checkbox"/> Male <input type="checkbox"/> Female | 4. Does anyone in this HH know about BHOMA?<br><input type="checkbox"/> Yes <input type="checkbox"/> No | 5. Has this HH Been visited by a BHOMA CHW in the last 4 months?<br><input type="checkbox"/> Yes <input type="checkbox"/> No<br><input type="checkbox"/> Not Sure | 6. Has BHOMA helped change your household's health seeking behavior?<br><input type="checkbox"/> Yes <input type="checkbox"/> No | 7. Average time a CHW spends at your house:<br><input type="checkbox"/> Short <input type="checkbox"/> Medium<br><input type="checkbox"/> Long <input type="checkbox"/> N/A | 8. Topics discussed with BHOMA CHW at last visit (tick all that apply)                                                                                                                                                                                                                                                                                                                                                                                           |
|                      |                                                                                                    |                                                                                        |                                                                                                         | 9. Comments:                                                                                                                                                      |                                                                                                                                  |                                                                                                                                                                             |                                                                                                                                                                                                                                                                                                                                                                                                                                                                  |
|                      |                                                                                                    |                                                                                        |                                                                                                         |                                                                                                                                                                   |                                                                                                                                  |                                                                                                                                                                             | <input type="checkbox"/> Malaria <input type="checkbox"/> HIV/AIDS <input type="checkbox"/> STI <input type="checkbox"/> Pregnancy<br><input type="checkbox"/> Diarrhea <input type="checkbox"/> Child Health <input type="checkbox"/> BHOMA<br><input type="checkbox"/> Nutrition <input type="checkbox"/> Water/Sanitation <input type="checkbox"/> TB<br><input type="checkbox"/> Family Planning <input type="checkbox"/> Other <input type="checkbox"/> N/A |

|                      |                                                                                                    |                                                                                        |                                                                                                         |                                                                                                                                                                   |                                                                                                                                  |                                                                                                                                                                             |                                                                                                                                                                                                                                                                                                                                                                                                                                                                  |
|----------------------|----------------------------------------------------------------------------------------------------|----------------------------------------------------------------------------------------|---------------------------------------------------------------------------------------------------------|-------------------------------------------------------------------------------------------------------------------------------------------------------------------|----------------------------------------------------------------------------------------------------------------------------------|-----------------------------------------------------------------------------------------------------------------------------------------------------------------------------|------------------------------------------------------------------------------------------------------------------------------------------------------------------------------------------------------------------------------------------------------------------------------------------------------------------------------------------------------------------------------------------------------------------------------------------------------------------|
| 1. No Of HH Sampled: | 2. Are you the head of this Household?<br><input type="checkbox"/> Yes <input type="checkbox"/> No | 3. Sex of Respondent:<br><input type="checkbox"/> Male <input type="checkbox"/> Female | 4. Does anyone in this HH know about BHOMA?<br><input type="checkbox"/> Yes <input type="checkbox"/> No | 5. Has this HH Been visited by a BHOMA CHW in the last 4 months?<br><input type="checkbox"/> Yes <input type="checkbox"/> No<br><input type="checkbox"/> Not Sure | 6. Has BHOMA helped change your household's health seeking behavior?<br><input type="checkbox"/> Yes <input type="checkbox"/> No | 7. Average time a CHW spends at your house:<br><input type="checkbox"/> Short <input type="checkbox"/> Medium<br><input type="checkbox"/> Long <input type="checkbox"/> N/A | 8. Topics discussed with BHOMA CHW at last visit (tick all that apply)                                                                                                                                                                                                                                                                                                                                                                                           |
|                      |                                                                                                    |                                                                                        |                                                                                                         | 9. Comments:                                                                                                                                                      |                                                                                                                                  |                                                                                                                                                                             |                                                                                                                                                                                                                                                                                                                                                                                                                                                                  |
|                      |                                                                                                    |                                                                                        |                                                                                                         |                                                                                                                                                                   |                                                                                                                                  |                                                                                                                                                                             | <input type="checkbox"/> Malaria <input type="checkbox"/> HIV/AIDS <input type="checkbox"/> STI <input type="checkbox"/> Pregnancy<br><input type="checkbox"/> Diarrhea <input type="checkbox"/> Child Health <input type="checkbox"/> BHOMA<br><input type="checkbox"/> Nutrition <input type="checkbox"/> Water/Sanitation <input type="checkbox"/> TB<br><input type="checkbox"/> Family Planning <input type="checkbox"/> Other <input type="checkbox"/> N/A |

Sampled by:

Signature:
